# Supplementary material for: Nucleotide variants in hepatitis B virus preS region predict the recurrence of hepatocellular carcinoma
Source: publisher site journal article supplement (doi:10.18632/aging.203531), 2021-09-17
Supplement: Supplementary file [file aging-v13i18-203531-supplementary-material-SD4.pdf]

**Supplementary Table 7. Transcription factor binding sites predicted in the region of preS2.**

| <b>Motif ID</b> | <b>Transcription factor</b> | <b>Start</b> | <b>Stop</b> | <b>Strand</b> | <b>Score</b> | <b>P value</b> | <b>FDR</b> |
|-----------------|-----------------------------|--------------|-------------|---------------|--------------|----------------|------------|
| MA0484.1        | HNF4G                       | 138          | 152         | -             | 8.38         | 2.25e-4        | 0.06       |
| MA0505.1        | Nr5a2                       | 29           | 43          | +             | 4.90         | 4.93e-4        | 0.07       |
| MA0505.1        | Nr5a2                       | 40           | 54          | -             | 3.34         | 7.89e-4        | 0.07       |
| MA0505.1        | Nr5a2                       | 35           | 49          | +             | 3.21         | 8.21e-4        | 0.07       |
| MA1101.1        | BACH2                       | 30           | 43          | -             | 6.69         | 3.69e-4        | 0.10       |
| MA0114.3        | Hnf4a                       | 136          | 151         | -             | -4.58        | 4.23e-4        | 0.11       |
| MA0501.1        | MAF::NFE2                   | 28           | 42          | -             | 3.16         | 4.18e-4        | 0.12       |
| MA1147.1        | NR4A2::RXRA                 | 35           | 49          | -             | 5.77         | 5.69e-4        | 0.15       |
| MA0150.2        | Nfe2l2                      | 32           | 46          | -             | 3.61         | 7.08e-4        | 0.20       |
| MA0728.1        | Nr2f6(var.2)                | 27           | 41          | +             | -18.34       | 8.13e-4        | 0.23       |
| MA0138.2        | REST                        | 135          | 155         | +             | -3.04        | 9.58e-4        | 0.23       |

Abbreviation: FDR, false discovery rate.

**Supplementary Table 8. Gene sets enriched in the tumors with high/low frequencies of two HBV variants.**

| Gene set                                                                          | Size | ES    | NES   | P value  | FWER  |
|-----------------------------------------------------------------------------------|------|-------|-------|----------|-------|
| <b>Gene sets enriched in the tumors with low frequencies of two HBV variants</b>  |      |       |       |          |       |
| CHIANG_LIVER_CANCER_SUBCLASS_PROLIFERATION_DN                                     | 178  | -0.52 | -2.73 | <1E-3    | <1E-3 |
| CHIANG_LIVER_CANCER_SUBCLASS_CTNNB1_UP                                            | 170  | -0.51 | -2.66 | <1E-3    | <1E-3 |
| CAIRO_HEPATOBLASTOMA_CLASSES_DN                                                   | 213  | -0.44 | -2.35 | <1E-3    | 0.003 |
| LEE_LIVER_CANCER_SURVIVAL_UP                                                      | 177  | -0.44 | -2.32 | <1E-3    | 0.005 |
| FARMER_BREAST_CANCER_CLUSTER_1                                                    | 47   | -0.52 | -2.15 | <1E-3    | 0.051 |
| <b>Gene sets enriched in the tumors with high frequencies of two HBV variants</b> |      |       |       |          |       |
| NIKOLSKY_BREAST_CANCER_8Q23_Q24_AMPLICON                                          | 145  | 0.62  | 2.86  | <1E-3    | <1E-3 |
| CHIANG_LIVER_CANCER_SUBCLASS_PROLIFERATION_UP                                     | 174  | 0.56  | 2.62  | <1E-3    | <1E-3 |
| SOTIRIOU_BREAST_CANCER_GRADE_1_VS_3_UP                                            | 152  | 0.52  | 2.41  | <1E-3    | <1E-3 |
| BOYALT_LIVER_CANCER_SUBCLASS_G3_UP                                                | 190  | 0.51  | 2.41  | <1E-3    | 0.001 |
| LEE_LIVER_CANCER_SURVIVAL_DN                                                      | 174  | 0.51  | 2.39  | <1E-3    | 0.001 |
| KAMMINGA_EZH2_TARGETS                                                             | 40   | 0.65  | 2.39  | <1E-3    | 0.001 |
| NIKOLSKY_BREAST_CANCER_8Q12_Q22_AMPLICON                                          | 122  | 0.54  | 2.38  | <1E-3    | 0.001 |
| NIKOLSKY_BREAST_CANCER_17Q11_Q21_AMPLICON                                         | 105  | 0.54  | 2.32  | <1E-3    | 0.001 |
| KOBAYASHI_EGFR_SIGNALING_24HR_DN                                                  | 251  | 0.47  | 2.32  | <1E-3    | 0.001 |
| BURTON_ADIPOGENESIS_3                                                             | 93   | 0.54  | 2.32  | <1E-3    | 0.001 |
| MITSIADES_RESPONSE_TO_APLIDIN_DN                                                  | 247  | 0.47  | 2.28  | <1E-3    | 0.001 |
| ROSTY_CERVICAL_CANCER_PROLIFERATION_CLUSTER                                       | 140  | 0.50  | 2.27  | <1E-3    | 0.001 |
| SHEDDEN_LUNG_CANCER_POOR_SURVIVAL_A6                                              | 445  | 0.44  | 2.25  | <1E-3    | 0.002 |
| WONG_EMBRYONIC_STEM_CELL_CORE                                                     | 332  | 0.45  | 2.24  | <1E-3    | 0.002 |
| BORCZUK_MALIGNANT_MESOTHELIOMA_UP                                                 | 308  | 0.44  | 2.20  | <1E-3    | 0.006 |
| AGUIRRE_PANCREATIC_CANCER_COPY_NUMBER_UP                                          | 294  | 0.45  | 2.19  | <1E-3    | 0.007 |
| VILLANUEVA_LIVER_CANCER_KRT19_UP                                                  | 167  | 0.46  | 2.16  | <1E-3    | 0.01  |
| CHIN_BREAST_CANCER_COPY_NUMBER_UP                                                 | 23   | 0.68  | 2.16  | <1E-3    | 0.01  |
| CHIANG_LIVER_CANCER_SUBCLASS_UNANNOTATED_DN                                       | 192  | 0.46  | 2.15  | <1E-3    | 0.011 |
| RHODES_CANCER_META_SIGNATURE                                                      | 65   | 0.54  | 2.15  | <1E-3    | 0.011 |
| ABRAMSON_INTERACT_WITH_AIRE                                                       | 43   | 0.57  | 2.14  | <1E-3    | 0.014 |
| DAVICIONI_MOLECULAR_ARMS_VS_ERMS_DN                                               | 174  | 0.45  | 2.11  | <1E-3    | 0.022 |
| LI_WILMS_TUMOR_VS_FETAL_KIDNEY_1_DN                                               | 164  | 0.46  | 2.10  | <1E-3    | 0.023 |
| LE_EGR2_TARGETS_UP                                                                | 107  | 0.48  | 2.09  | <1E-3    | 0.029 |
| REN_BOUND_BY_E2F                                                                  | 61   | 0.52  | 2.07  | <1E-3    | 0.042 |
| WOO_LIVER_CANCER_RECURRENCE_UP                                                    | 103  | 0.48  | 2.07  | <1E-3    | 0.043 |
| PAL_PRMT5_TARGETS_UP                                                              | 200  | 0.43  | 2.07  | <1E-3    | 0.043 |
| WAMUNYOKOLI_OVARIAN_CANCER_GRADES_1_2_UP                                          | 139  | 0.46  | 2.07  | <1E-3    | 0.044 |
| HEIDENBLAD_AMPLIFIED_IN_PANCREATIC_CANCER                                         | 55   | 0.53  | 2.07  | <1E-3    | 0.047 |
| BIDUS_METASTASIS_UP                                                               | 210  | 0.43  | 2.06  | <1E-3    | 0.051 |
| JECHLINGER_EPITHELIAL_TO_MESENCHYMAL_TRANSITION_DN                                | 56   | 0.53  | 2.06  | <1E-3    | 0.052 |
| WHITEFORD_PEDIATRIC_CANCER_MARKERS                                                | 113  | 0.47  | 2.06  | <1E-3    | 0.052 |
| JIANG_AGING_CEREBRAL_CORTEX_DN                                                    | 45   | 0.55  | 2.06  | 1.55E-03 | 0.054 |
| MEINHOLD_OVARIAN_CANCER_LOW_GRADE_DN                                              | 19   | 0.67  | 2.05  | <1E-3    | 0.058 |
| TURASHVILI_BREAST_LOBULAR_CARCINOMA_VS_DUCTAL_NORMAL_UP                           | 66   | 0.51  | 2.05  | <1E-3    | 0.059 |
| GRAHAM_NORMAL_QUIESCENT_VS_NORMAL_DIVIDING_DN                                     | 87   | 0.49  | 2.05  | <1E-3    | 0.061 |
| NIKOLSKY_BREAST_CANCER_17Q21_Q25_AMPLICON                                         | 298  | 0.41  | 2.04  | <1E-3    | 0.069 |
| YAO_TEMPORAL_RESPONSE_TO_PROGESTERONE_CLUSTER_14                                  | 143  | 0.45  | 2.04  | <1E-3    | 0.072 |
| MARKEY_RB1_ACUTE_LOF_UP                                                           | 229  | 0.42  | 2.04  | <1E-3    | 0.074 |
| DING_LUNG_CANCER_EXPRESSION_BY_COPY_NUMBER                                        | 100  | 0.47  | 2.03  | <1E-3    | 0.076 |
| CROONQUIST_IL6_DEPRIVATION_DN                                                     | 95   | 0.47  | 2.03  | <1E-3    | 0.076 |
| HOSHIDA_LIVER_CANCER_SUBCLASS_S2                                                  | 114  | 0.45  | 2.03  | <1E-3    | 0.082 |
| RHODES_UNDIFFERENTIATED_CANCER                                                    | 69   | 0.50  | 2.03  | <1E-3    | 0.085 |
| VECCHI_GASTRIC_CANCER_ADVANCED_VS_EARLY_UP                                        | 169  | 0.43  | 2.02  | <1E-3    | 0.088 |
| BLUM_RESPONSE_TO_SALIRASIB_DN                                                     | 336  | 0.40  | 2.02  | <1E-3    | 0.091 |
| FUJII_YBX1_TARGETS_DN                                                             | 194  | 0.43  | 2.02  | <1E-3    | 0.091 |
| MARKEY_RB1_CHRONIC_LOF_UP                                                         | 107  | 0.47  | 2.02  | <1E-3    | 0.097 |

Abbreviation: ES, enrichment score; NES, normalized ES; FWER, familywise-error rate.
